# Supplementary material
Source: PubMed Central journal article supplement (PMC8553555)
Supplement: jci-131-146187-s052.pdf [file jci-131-146187-s052.pdf]

1 **Supplemental Information**

2

3 **Cul4A-DDB1-mediated monoubiquitination of phosphoglycerate dehydrogenase**  
4 **promotes colorectal cancer metastasis via increased S-adenosylmethionine**

5 Yajuan Zhang<sup>1,8</sup>, Hua Yu<sup>1,8</sup>, Jie Zhang<sup>2,8</sup>, Hong Gao<sup>1</sup>, Siyao Wang<sup>1</sup>, Shuxian Li<sup>2</sup>, Ping Wei<sup>3</sup>, Ji

6 Liang<sup>1</sup>, Guanzhen Yu<sup>4</sup>, Xiongjun Wang<sup>5\*</sup>, Xinxiang Li<sup>6\*</sup>, Dawei Li<sup>6\*</sup>, Weiwei Yang<sup>1,7,9\*</sup>

7

8

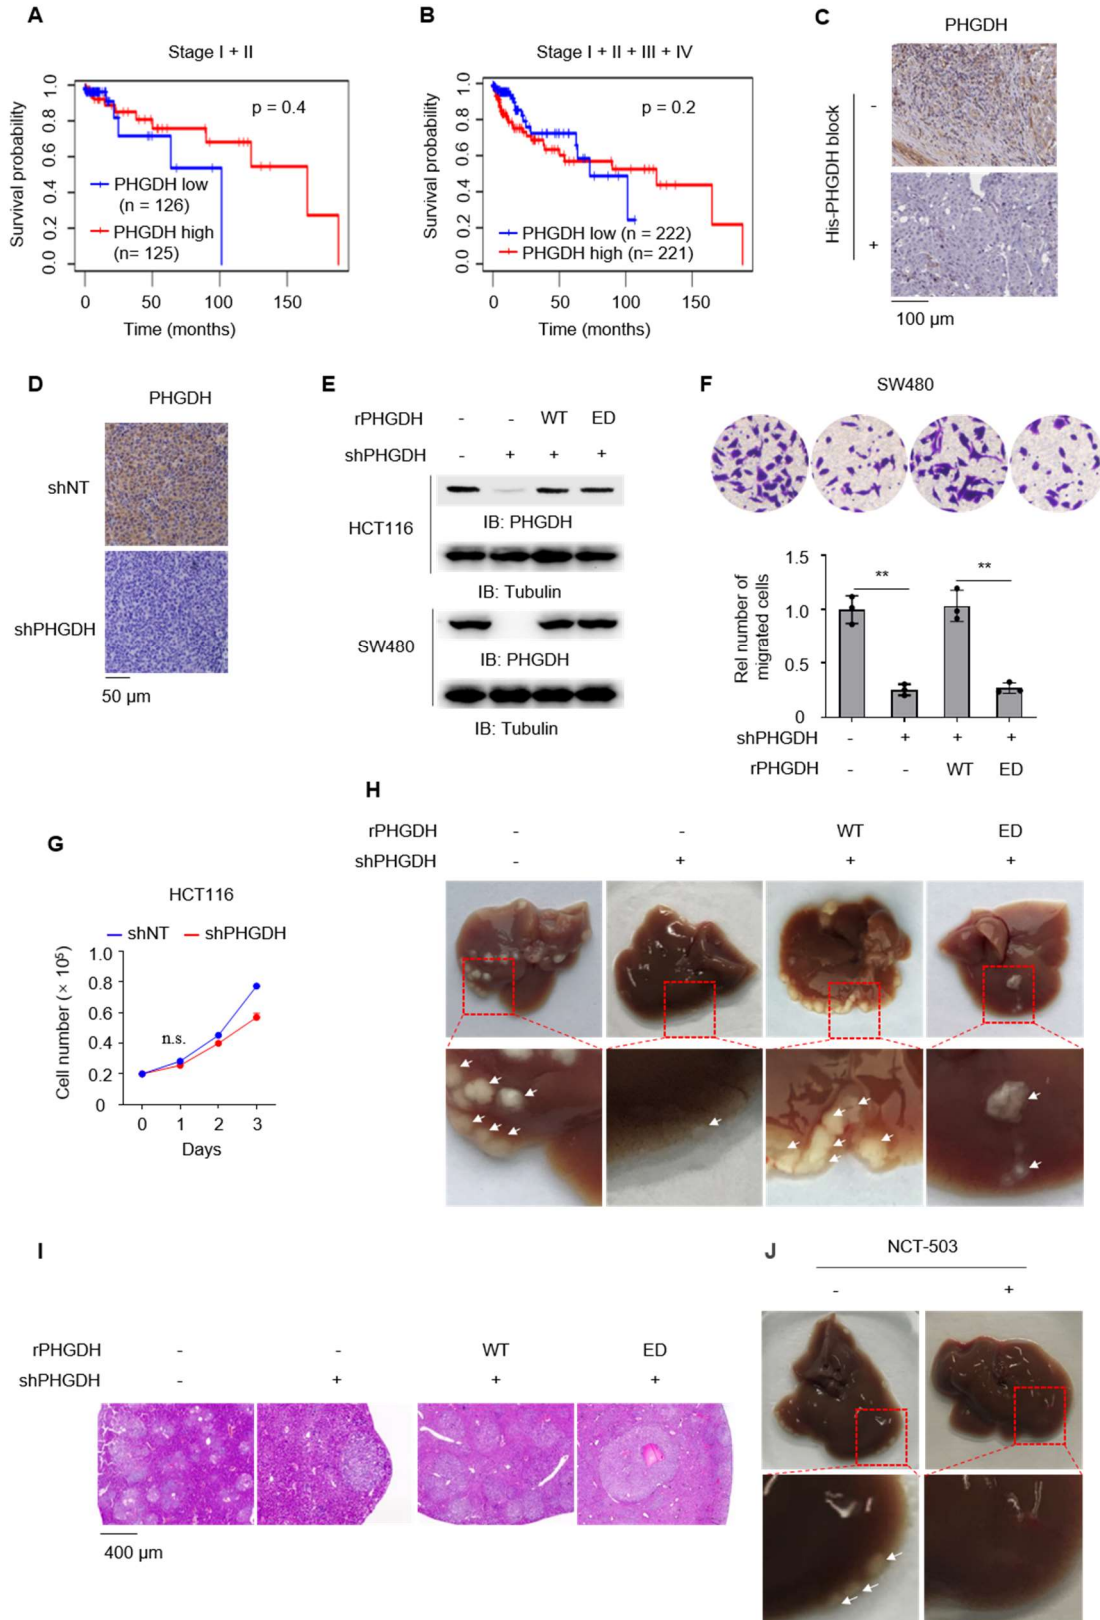

9

10

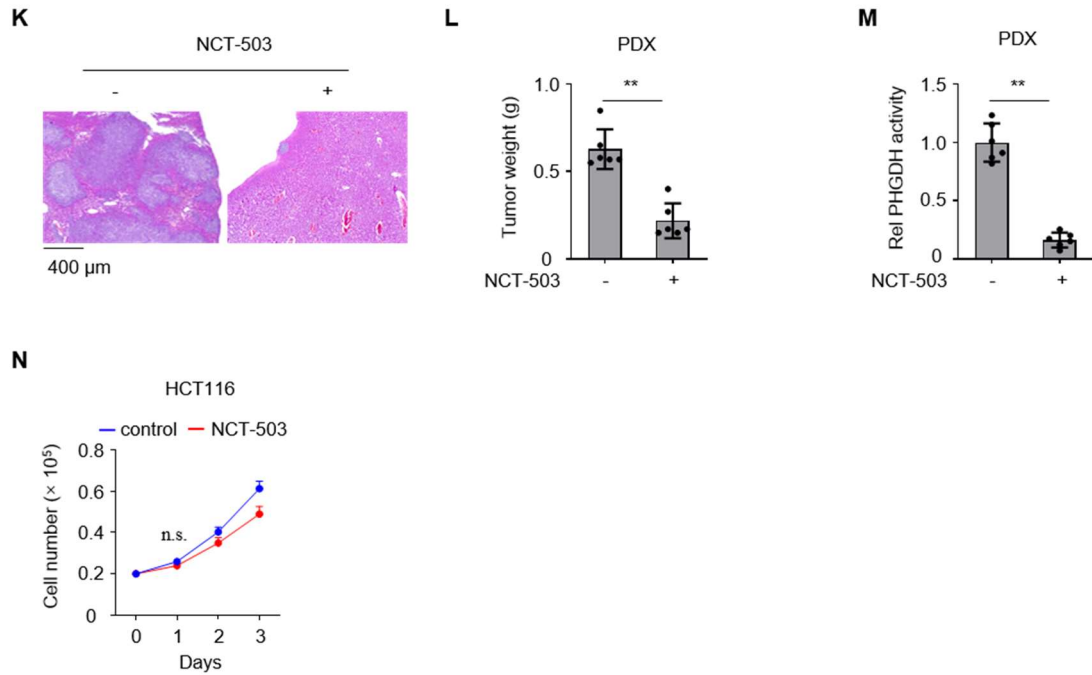

11

12 **Figure S1. PHGDH Activity is important for CRC Metastasis.** Related to Figure 1.

13 (F, G, N) Data represent the mean  $\pm$  SD of three biologically independent experiments. F,

14 1-way ANOVA with Tukey's multiple comparison test; G, N, two-tailed Student's t-test.

15 (A, B) TCGA RNA-sequencing data of patients with colon adenocarcinoma were analyzed.

16 Survival durations of 251 patients with colon adenocarcinoma with low or high expression of

17 *PHGDH* were compared (A). Survival durations of 443 patients with colon adenocarcinoma

18 with low or high expression of *PHGDH* were compared (B). Kaplan-Meier Method.

19 (C) Validation of antibody specificity. IHC analyses of human CRC specimens were

20 performed with anti-PHGDH antibody in the absence or presence of His-PHGDH blocking

21 protein. Data are representative of three biologically independent experiments.

22 (D) HCT116 cells expressing shNT or shPHGDH were subcutaneously implanted into

23 BALB/c nude mice. IHC analyses were performed in dissected tumor tissues.

24 (E) HCT116 or SW480 cells stably expressing shRNA targeting shNT or PHGDH were

25 infected with the lentivirus expressing rPHGDH WT or ED.

26 (F) SW480 cells stably expressing shNT or shPHGDH were infected with the lentivirus  
27 expressing rPHGDH WT or ED. Transwell migration assays were performed in these cells.

28 Rel: relative.

29 (G) Cell proliferation was examined in HCT116 cells stably expressing shNT or shPHGDH.

30 (H, I) HCT116 cells stably expressing shNT or shPHGDH were infected with the lentivirus  
31 expressing rPHGDH WT or ED. Cells were injected into spleen of randomized BALB/c nude  
32 mice. Representative images of liver metastasis were shown (H). The metastatic nodules in  
33 the livers were dissected and stained with H&E. Representative images of H&E-stained  
34 metastatic nodules were shown (I).

35 (J, K) The metastatic tumor tissues were dissected from CRC patients with liver metastasis  
36 and subcutaneously implanted into randomized BALB/c nude mice. Mice were treated with or  
37 without NCT-503. Representative images of liver metastasis were shown (J). The metastatic  
38 nodules in the livers were dissected and stained with H&E. Representative images of  
39 H&E-stained metastatic nodules were shown (K).

40 (L, M) The metastatic tumor tissues were dissected from CRC patients with liver metastasis  
41 and subcutaneously implanted into randomized BALB/c nude mice. Mice were treated with or  
42 without NCT-503. 5 weeks after inoculation, the weights of dissected subcutaneous tumors  
43 were measured (L). PHGDH activity in the tumors was determined (M).

44 (N) Cell proliferation was examined in HCT116 cells treated with or without 10  $\mu$ M  
45 NCT-503.

46

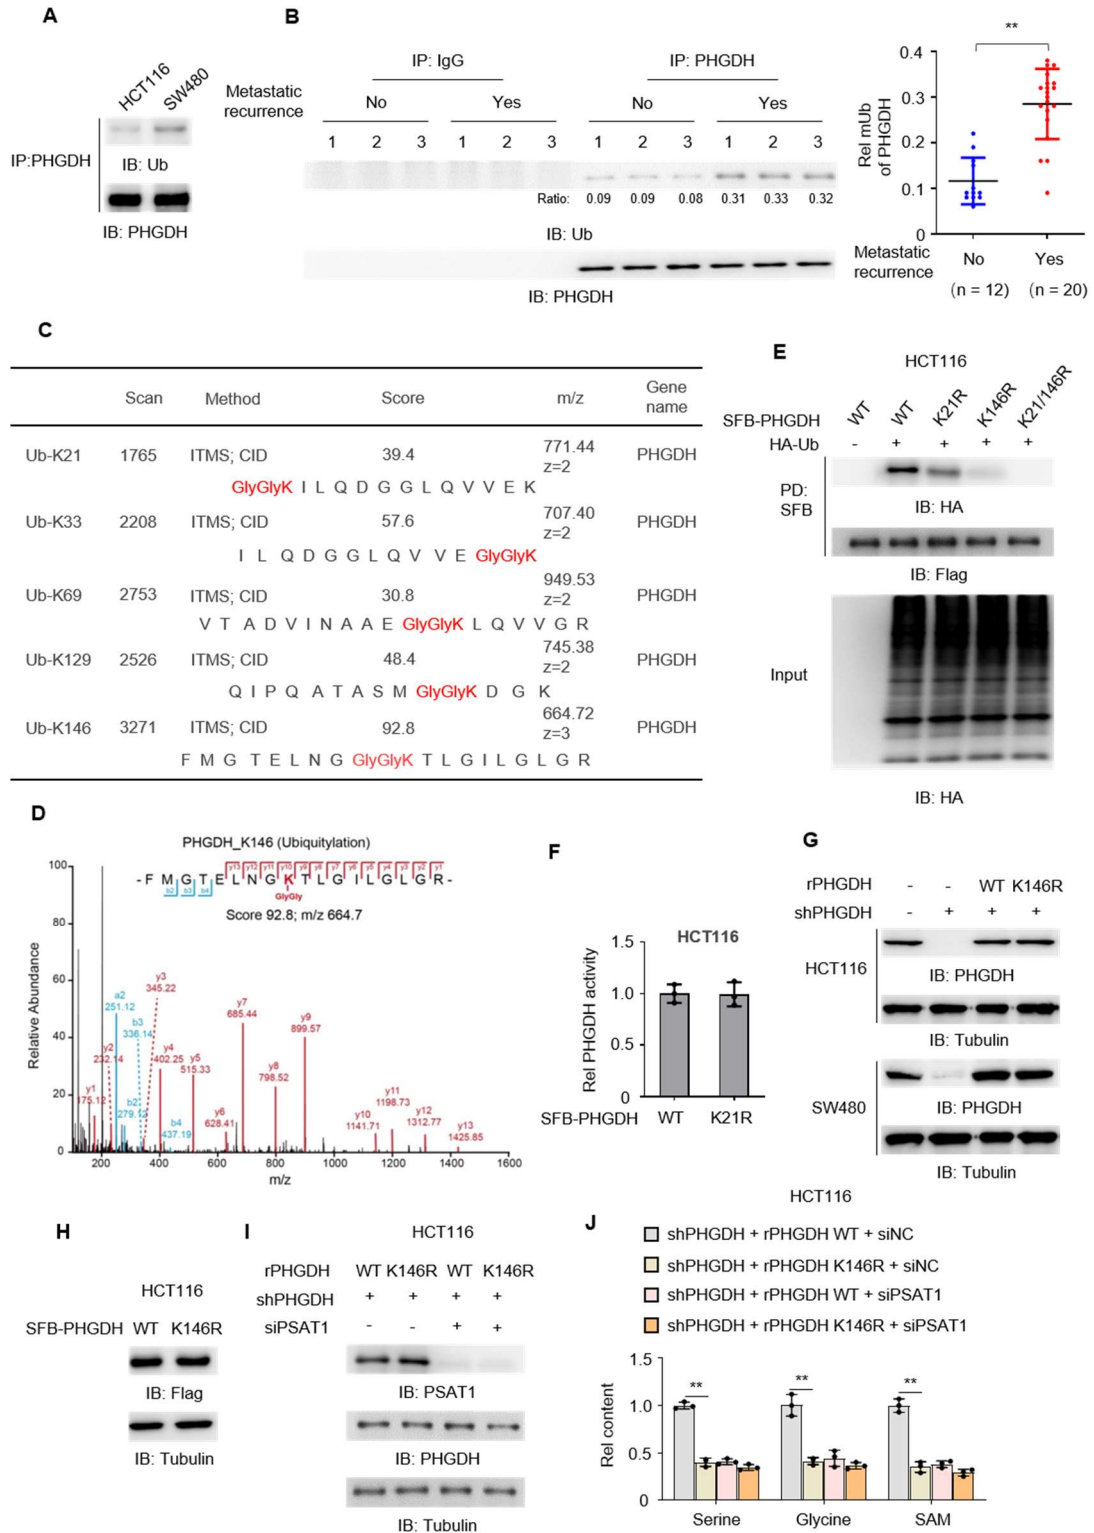

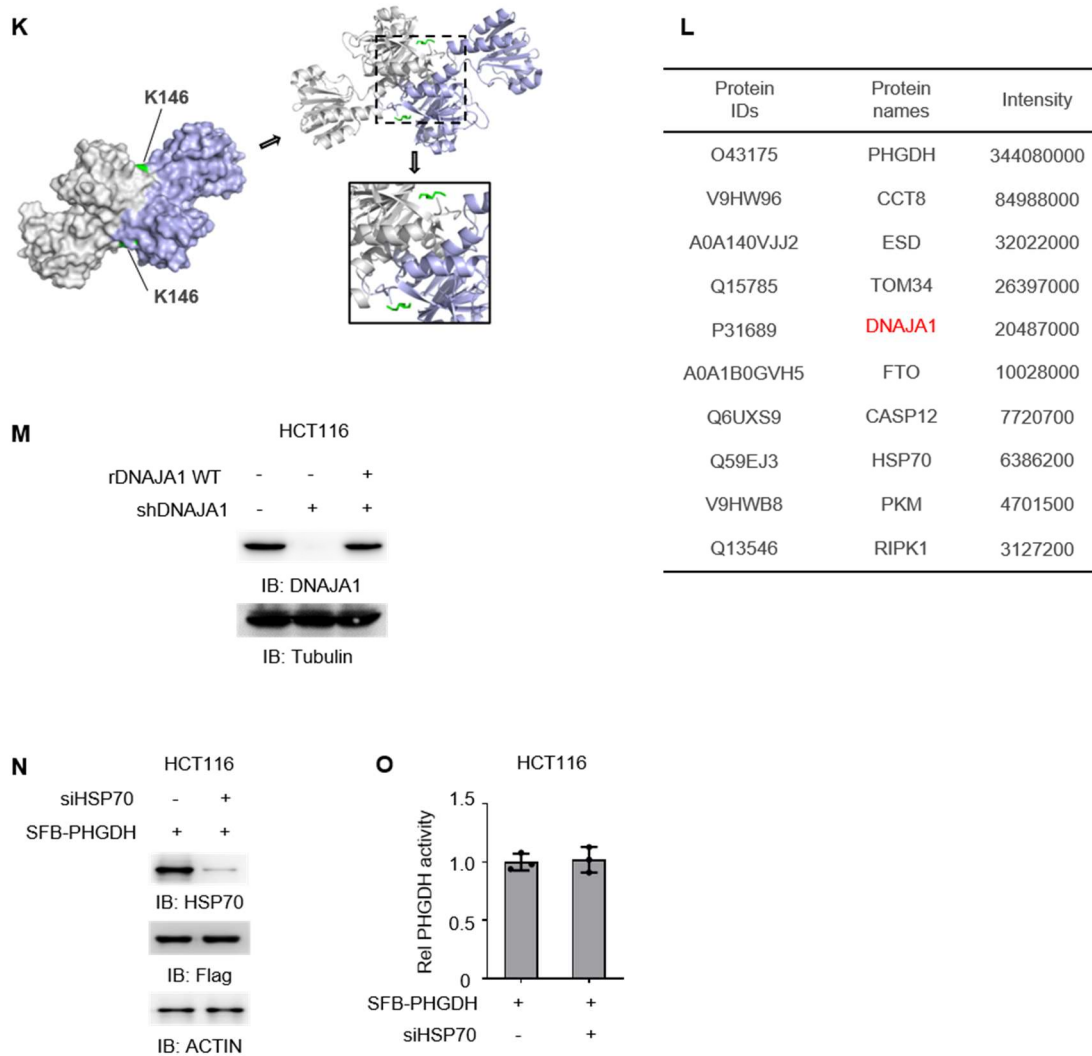

48

49 **Figure S2. Monoubiquitination Increases PHGDH Activity through DNAJA1-Dependent**  
 50 **PHGDH Tetrameric Formation.** Related to Figure 2.

51 (F, J, O) Data represent the mean  $\pm$  SD of three biologically independent experiments  
 52 (two-tailed Student's t-test).

53 (A) HCT116 or SW480 cells were harvested and PHGDH proteins were immunoprecipitated  
 54 using anti-PHGDH antibody. IP: immunoprecipitation.

55 (B) PHGDH proteins were immunoprecipitated from primary tumors from CRC patients with  
 56 or without metastatic recurrence using anti-PHGDH antibody. We adjusted the amount of

57 immunoprecipitated PHGDH from the tumors of these two groups to the similar levels.

58 Monoubiquitination of PHGDH was examined using immunoblotting analyses with  
59 anti-ubiquitin antibody. Left, representative images of immunoblotting were shown. Right,  
60 semi-quantitative scoring was carried out. Data represent the mean  $\pm$  SD (two-tailed Student's  
61 t-test). mUb, monoubiquitination.

62 (C-D) SFB-PHGDH was pulldown from HCT116 cells. The ubiquitinated residues in  
63 PHGDH, identified by mass spectrometry analyses, were listed (C). The mass spectrum of  
64 ubiquitinated K146 was presented (D).

65 (E) HCT116 cells stably expressing SFB-PHGDH WT or indicated mutants were transfected  
66 with or without HA-Ub.

67 (F) SFB-PHGDH proteins were pulldown from HCT116 cells stably expressing SFB-PHGDH  
68 WT or K21R with streptavidin agarose beads. PHGDH activity was determined.

69 (G) HCT116 or SW480 cells were depleted of endogenous PHGDH and rescued with  
70 rPHGDH WT or K146R.

71 (H) HCT116 cells were transfected with SFB-PHGDH WT or K146R.

72 (I, J) PHGDH-depleted HCT116 cells rescued with rPHGDH WT or K146R cells were  
73 transfected with siNC or siPSAT1. Immunoblotting analyses were performed in these cells (I).  
74 Cells were harvested for the measurement of intracellular serine, glycine and SAM (J).

75 (K) Structure of dimeric PHGDH was shown (PDB: 2G76). Green residue represents PHGDH  
76 K146.

77 (L) Mass spectrometry analyses of PHGDH-associated proteins were performed in HCT116  
78 cells. The top 9 proteins that showed strong interactions with PHGDH were listed.

79 (M) HCT116 cells stably expressing SFB-PHGDH and shNT or shDNAJA1 were infected

80 with the lentivirus expressing EV or rDNAJA1 WT.  
81 (N, O) HCT116 cells stably expressing SFB-PHGDH were transfected with siNC or siHSP70.  
82 Immunoblotting analyses were performed in these cells (N). PHGDH activity was measured  
83 in these cells (O).  
84  
85



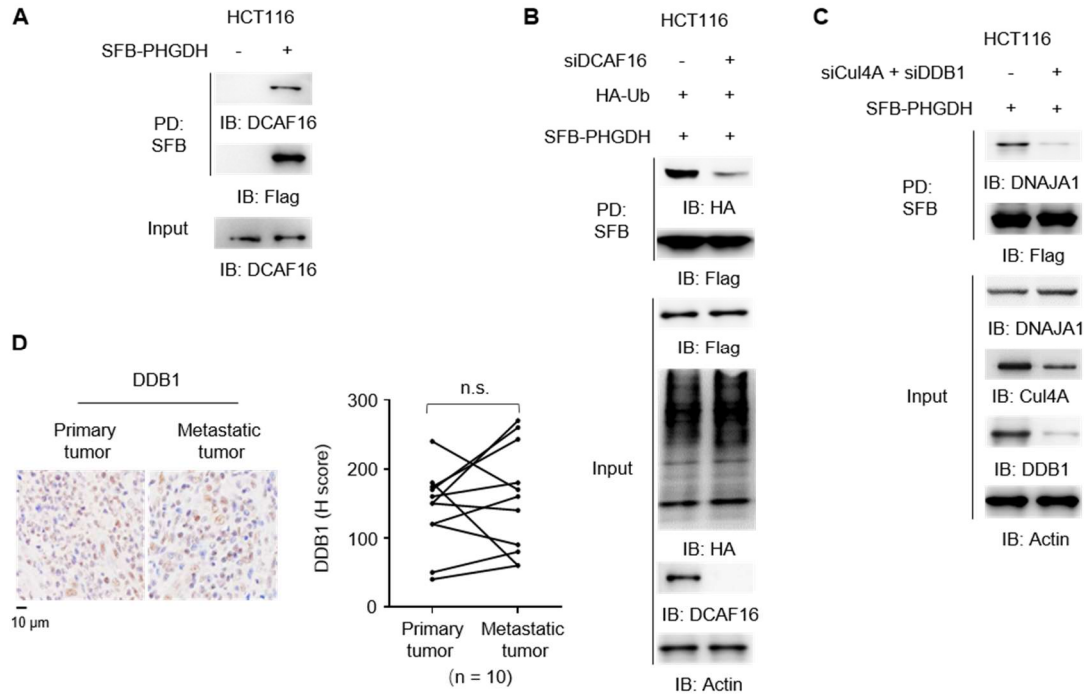

86

87 **Figure S3. Cul4A-DDB1-DCAF16 Complex Mediates the monoubiquitination of**  
88 **PHGDH.** Related to Figure 3.

89 (A) HCT116 cells were transfected with EV or SFB-PHGDH. SFB-PHGDH proteins were  
90 pulldown with streptavidin agarose beads.

91 (B) HCT116 cells stably expressing SFB-PHGDH were transfected with siNC or siDCAF16  
92 and HA-Ub. SFB-PHGDH proteins were immunoprecipitated.

93 (C) HCT116 cells stably expressing SFB-PHGDH were transfected with siNC or siCul4A and  
94 siDDB1. SFB-PHGDH proteins were pulldown with streptavidin agarose beads.

95 (D) IHC staining was performed in paired primary tumors and hepatic metastatic tumors from  
96 10 CRC patients using anti-DDB1 antibody. Staining scores of DDB1 were compared  
97 between primary tumors and metastatic tumors. Left, representative images of IHC staining  
98 were shown. Right, semi-quantitative scoring was carried out (paired t test, two-tailed).

99

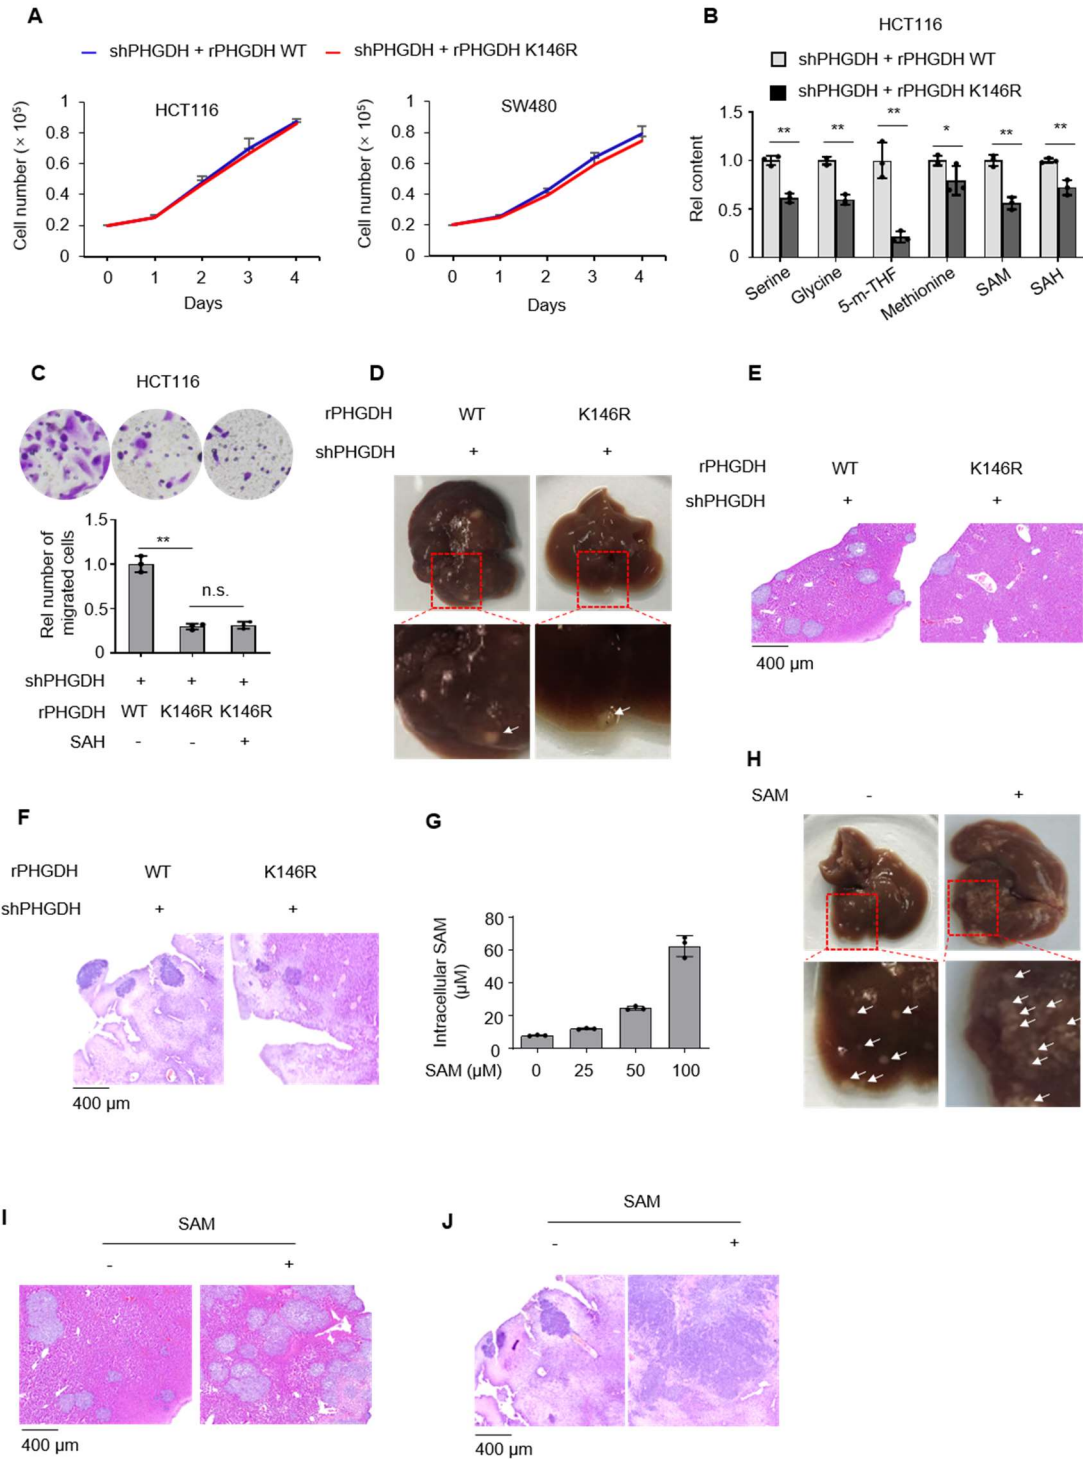

100

101 **Figure S4. Increased SAM Levels by PHGDH K146mUb Promotes CRC Metastasis.**

102 Related to Figure 4.

103 (A, B, C, G) Data represent the mean  $\pm$  SD of three biologically independent experiments A,

104 B, two-tailed Student's t-test; C, 1-way ANOVA with Tukey's multiple comparison test.

105 (A) Cell proliferation was examined in PHGDH-depleted HCT116 or SW480 cells rescued  
106 with rPHGDH WT or K146R.

107 (B) PHGDH-depleted HCT116 cells were rescued with rPHGDH WT or K146R. Targeted  
108 metabolomics were performed to determine the intermediate levels of serine and glycine  
109 biosynthesis pathway and one-carbon metabolism.

110 (C) HCT116 cells were depleted of endogenous PHGDH and rescued with rPHGDH WT or  
111 K146R. These cells were supplemented with or without SAH (25  $\mu$ M). Transwell migration  
112 assays were performed in these cells.

113 (D-E) Cells in (C) were injected into spleen of randomized BALB/c nude mice.  
114 Representative images of liver metastasis were shown (D). The metastatic nodules in the  
115 livers were dissected and stained with H&E. Representative images of H&E-stained  
116 metastatic nodules were shown (E).

117 (F) Luciferase-expressing PHGDH-depleted HCT116 cells rescued with rPHGDH WT or  
118 K146R were implanted into cecum of randomized BALB/c nude mice (six mice per group). 8  
119 weeks after the implantation, H&E staining was performed in the dissected liver tissues from  
120 the mice. Representative images of H&E-stained metastatic nodules were shown.

121 (G) HCT116 cell were treated with increasing doses of SAM and intracellular SAM levels  
122 were examined.

123 (H-I) HCT116 cells were injected into spleen of randomized BALB/c nude mice (six mice per  
124 group), followed by the administration of SAM (20 mg/kg body weight) via oral gavage once  
125 daily for 3 weeks. 4 weeks after the injection, mouse livers were dissected. Representative  
126 images of liver metastasis were shown (H). The metastatic nodules in the livers were

127 dissected and stained with H&E. Representative images of H&E-stained metastatic nodules  
128 were shown (I).

129 (J) Luciferase-expressing HCT116 cells were implanted into cecum of randomized BALB/c  
130 nude mice (six mice per group). 2 weeks after the implantation, these mice were administrated  
131 with SAM (20 mg/kg body weight) via oral gavage once daily for 4 weeks. 8 weeks after the  
132 injection, H&E staining was performed in the dissected liver tissues from the mice.  
133 Representative images of H&E-stained metastatic nodules were shown.

134

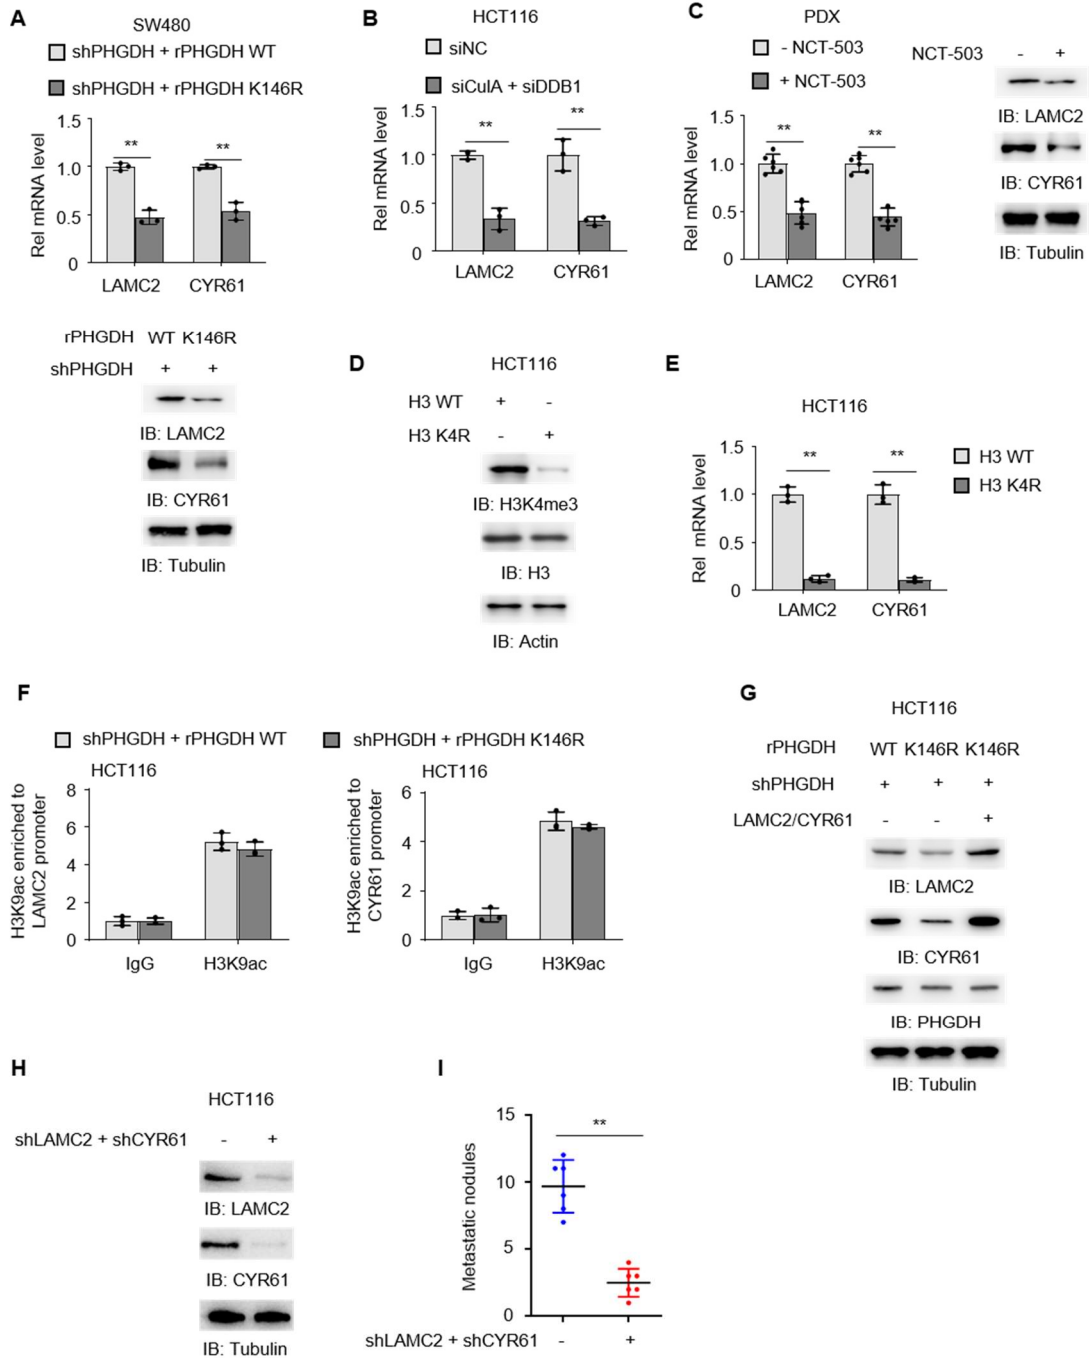

135

136 **Figure S5. PHGDH K146mUb Upregulates Cell Adhesion Gene Expression and**

137 **Promotes Tumor Cell Migration.** Related to Figure 5.

138 (A, B, E, F) Data represent the mean  $\pm$  SD of three biologically independent experiments

139 (two-tailed Student's t-test).

140 (A) The mRNA levels (top) and protein levels (bottom) of *LAMC2* and *CYR61* were examined

141 in PHGDH-depleted SW480 cells rescued with rPHGDH WT or K146R.

142 (B) HCT116 cells transfected with siNC or siCul4A and siDDB1 were harvested and the  
143 mRNA levels of *LAMC2* and *CYR61* were examined.

144 (C) The metastatic tumor tissues were dissected from CRC patients with liver metastasis and  
145 subcutaneously implanted into randomized BALB/c nude mice (six mice per group). 1 week  
146 after the implantation, these mice were intraperitoneally injected with PHGDH inhibitor  
147 (NCT-503, 25 mg/kg body weight) once daily for 3 weeks. 5 weeks after inoculation, mice  
148 were euthanized. The mRNA levels (top) and protein levels (bottom) of *LAMC2* and *CYR61*  
149 were examined in dissected tumor nodules. Data represent the mean  $\pm$  SD of mRNA level per  
150 mouse in six mice (two-tailed Student's t-test).

151 (D, E) HCT116 cells were transfected with H3 WT or H3 K4R. Immunoblotting analyses  
152 were performed (D). The mRNA levels of *LAMC2* and *CYR61* were examined in these cells  
153 (E).

154 (F) PHGDH-depleted HCT116 cells were rescued with rPHGDH WT or K146R. ChIP  
155 analyses were performed with anti-acetylated H3K9 (H3K9ac) antibody.

156 (G) PHGDH-depleted HCT116 cells rescued with rPHGDH WT or K146R were infected with  
157 or without the lentivirus expressing both *LAMC2* and *CYR61*.

158 (H, I) HCT116 cells were infected with the lentivirus expressing shNT or sh*LAMC2* and  
159 sh*CYR61*. Immunoblotting analyses were performed (H). Cells were injected into spleen of  
160 randomized BALB/c nude mice (six mice per group). 4 weeks after the injection, mouse  
161 livers were dissected. The metastatic nodules in the livers were counted and statistically  
162 analyzed (I). Data represent the mean  $\pm$  SD of the metastatic nodules per mouse in six mice

163 (two-tailed Student's t-test).

164

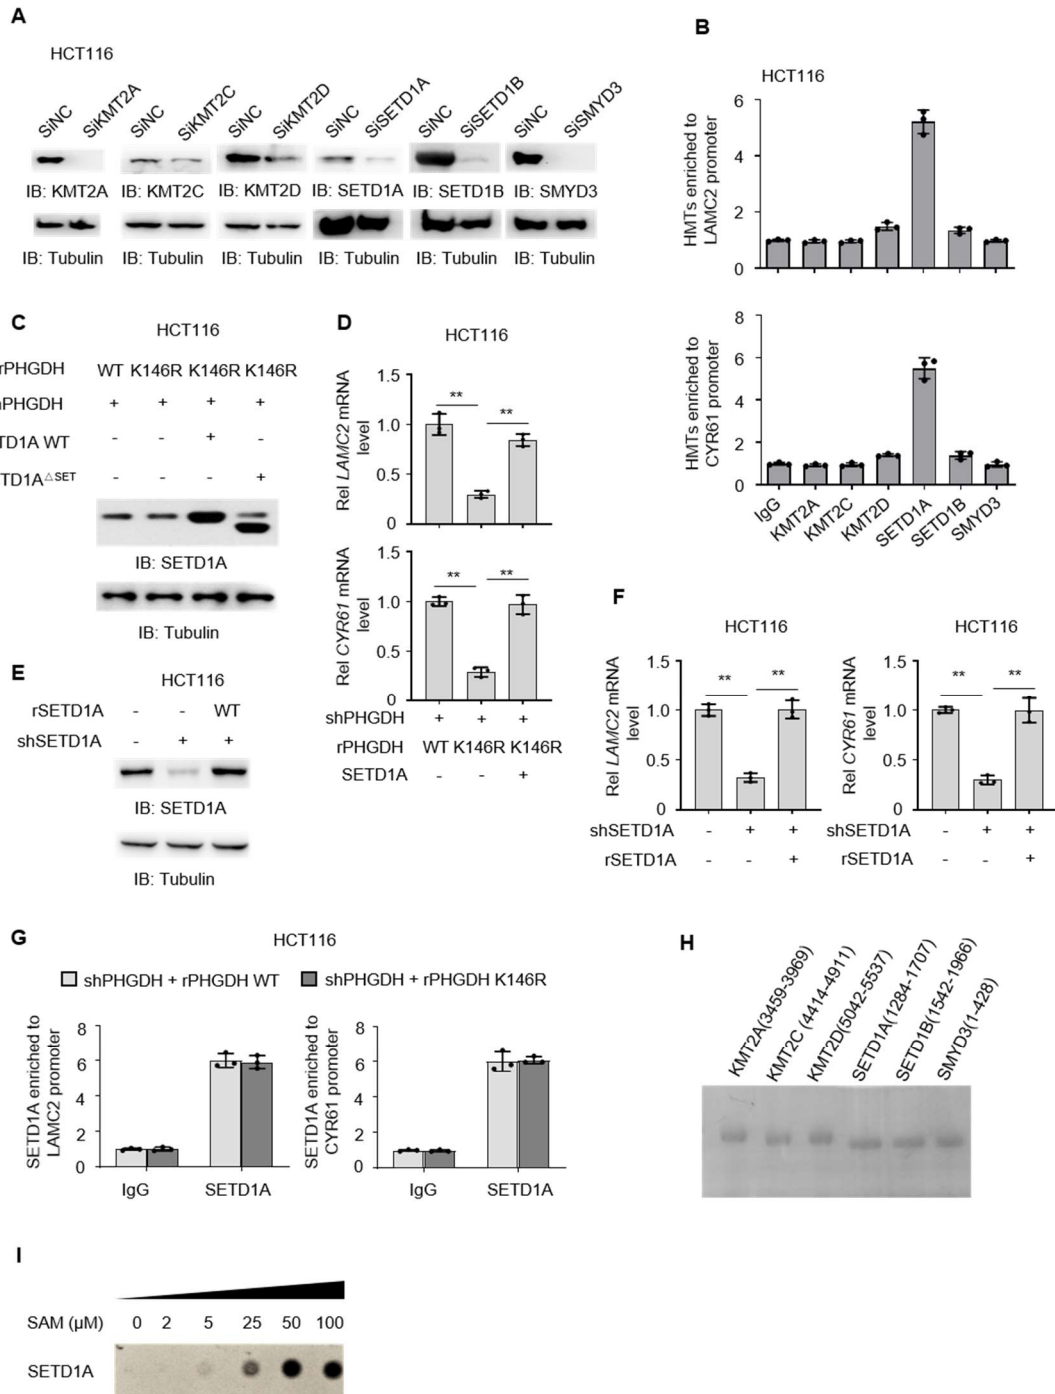

165

166 **Figure S6. Increased SAM Levels by PHGDH K146mUb Promotes Tumor Cell**

167 **Migration by Initiating SETD1A-Mediated Histone Methylation of *LAMC2* and *CYR61*.**

168 Related to Figure 6.

169 (B, D, F, G) Data represent the mean  $\pm$  SD of three biologically independent experiments D, F,

170 1-way ANOVA with Tukey's multiple comparison test; G, two-tailed Student's t-test.



171 (A) HCT116 cells were transfected with siRNAs targeting NC, KMT2A, KMT2C, KMT2D,  
172 SETD1A, SETD1B or SMYD3.

173 (B) ChIP analyses were performed in HCT116 cells with indicated antibodies.

174 (C) PHGDH-depleted HCT116 cells rescued with rPHGDH WT or K146R were infected with  
175 or without the lentivirus expressing SETD1A WT or SETD1A<sup>ΔSET</sup>. SETD1A expression was  
176 examined by immunoblotting analyses.

177 (D) PHGDH-depleted HCT116 cells rescued with rPHGDH WT or K146R were infected with  
178 or without the lentivirus expressing SETD1A. The mRNA levels of *LAMC2* and *CYR61* were  
179 examined.

180 (E, F) HCT116 cells were depleted of endogenous SETD1A and rescued with rSETD1A.  
181 SETD1A expression was examined by immunoblotting analyses (E). The mRNA levels of  
182 *LAMC2* and *CYR61* were examined (F).

183 (G) ChIP analyses with anti-SETD1A antibody were performed in PHGDH-depleted HCT116  
184 cells rescued with rPHGDH WT or K146R.

185 (H) Recombinant methyltransferase domain of KMT2A, KMT2C, KMT2D, SETD1A,  
186 SETD1B and SMYD3 were purified from bacteria and stained with Coomassie Blue.

187 (I) In vitro methylation assays were performed with purified recombinant His-tagged  
188 methyltransferase domains of SETD1A, SAM and H3K4 peptide, followed by dot blot  
189 analysis with anti-H3K4me3 antibody.

190
